# Supplementary material for: Phosphorylation of CRN2 by CK2 regulates F-actin and Arp2/3 interaction and inhibits cell migration
Source: PubMed Central journal article supplement — Sci Rep. 2012 Jan 31;2:241. doi: 10.1038/srep00241 (PMC3268813; doi:10.1038/srep00241), 2012-01-31
Supplement: srep00241-s1.pdf [file srep00241-s1.pdf]

**Phosphorylation of CRN2 by CK2 regulates F-actin and Arp2/3 interaction  
and inhibits cell migration.**

Charles-Peter Xavier<sup>1,‡,§</sup>, Raphael H. Rastetter<sup>1,§</sup>, Margit Blömacher<sup>1</sup>, Maria Stumpf<sup>1</sup>,  
Mirko Himmel<sup>2</sup>, Reginald O. Morgan<sup>3</sup>, Maria-Pilar Fernandez<sup>3</sup>, Conan Wang<sup>4</sup>, Asiah Osman<sup>4</sup>,  
Yoshihiko Miyata<sup>5</sup>, Ruth A. Gjerset<sup>6</sup>, Ludwig Eichinger<sup>1</sup>, Andreas Hofmann<sup>4</sup>, Stefan Linder<sup>2</sup>,  
Angelika A. Noegel<sup>1,7,8</sup>, Christoph S. Clemen<sup>1,\*</sup>

<sup>1</sup>Center for Biochemistry, Institute of Biochemistry I, Medical Faculty, University of Cologne,  
50931 Cologne, Germany

<sup>2</sup>Institute of Medical Microbiology, Virology and Hygiene, University Medical Center  
Hamburg-Eppendorf, 20246 Hamburg, Germany

<sup>3</sup>Department of Biochemistry and Molecular Biology, University of Oviedo and University  
Institute of Biotechnology of Asturias, Oviedo 33006, Spain

<sup>4</sup>Structural Chemistry, Eskitis Institute for Cell and Molecular Therapies, Griffith University,  
Brisbane, Qld 4111, Australia

<sup>5</sup>Department of Cell and Developmental Biology, Graduate School of Biostudies, Kyoto  
University, Kyoto 606-8502, Japan

<sup>6</sup>Torrey Pines Institute for Molecular Studies, San Diego, California 92121, USA

<sup>7</sup>Center for Molecular Medicine Cologne (CMMC), University of Cologne, 50931 Cologne,  
Germany

<sup>8</sup>Cologne Excellence Cluster on Cellular Stress Responses in Aging-Associated Diseases  
(CECAD), University of Cologne, 50931 Cologne, Germany

<sup>‡</sup>Present address: Laboratory of Cellular and Molecular Biology, Center for Cancer Research,  
National Cancer Institute, National Institutes of Health, Bethesda, MD 20892-4256, USA

<sup>§</sup>Both authors contributed equally to this work.

Author for correspondence:

C. S. Clemen, Institute of Biochemistry I, Medical Faculty, University of Cologne,  
Joseph-Stelzmann-Street 52, 50931 Cologne, Germany

Phone: +49 221 478 6980, Fax: +49 221 478 6979

E-Mail: christoph.clemen@uni-koeln.de

**This document contains the following supplementary information:**

**Legends to figures S1 to S7**

**Table S1**

**Supplementary References**

**Figures S1 to S7**

## Supplementary figure legends

### Figure S1

Three-dimensional model of human CRN2 displaying structural features of functional relevance.

The model was elaborated by sequence threading through the known structure of CRN4 (synonym: coronin 1A<sup>1</sup>). N-terminal signature motif (green); WD40 domains (alternating light/dark brown); C-terminal segment (blue) with an  $\alpha$ -helical portion (red) with the phospho-S463 site confined to the CRN2 subfamily. Amino acids highlighted in magenta denote sites predicted by SDPfox and show evidence of a conservation pattern able to distinguish individual coronin subfamilies; an example is labeled "SDP" (see also Fig. 1A, asterisks). "KGD", a motif universally conserved in coronin proteins (aa485-487 in CRN2).

### Figure S2

Low resolution solution structure of the synthetic S463-phosphorylated coiled coil peptide of CRN2 (aa435-474).

Shape restoration using small-angle X-ray scattering data (protein concentration  $\rho^* = 18 \text{ mg ml}^{-1}$ ) revealed a cylindrical elongated particle (shown in grey) with the approximate dimensions of 55 Å (height) x 15 Å (diameter). The shape can be fitted with the predicted model of the peptide (see Fig. 1B) adopting the fold of a three-stranded coiled coil (shown in colored stick representation). The goodness of fit of experimental and theoretical scattering curves was  $\chi = 5.5$ , as calculated with CRY SOL<sup>2</sup>.

### Figure S3

Quantitative illustration of the lamellipodial patterns shown in Fig. 8. Groups of bars are given for CRN2 S463D as well as CRN2 wild-type and S463A. For each group the first two bars illustrate the texture and width of the CRN2 distribution, the third and fourth bars illustrate the texture and width of the F-actin distribution, and the last bars indicate the width of the Arp2/3 distribution in the front of lamellipodia. While S463D CRN2 expressing cells predominantly

## Supplementary document.

showed spiky and irregular distributions of CRN2, actin and Arp2/3, the cells expressing S463A CRN2 mainly showed smooth and regular patterns. Individual lamellipodia of cells expressing wild-type CRN2 showed patterns either similar to the findings for S463D or S463A CRN2. Rough, spiky pattern; irregular, varying width of distribution.

### Figure S4

Subcellular localization of CRN2 constructs in primary human macrophages.

Fluorescence micrographs of macrophages expressing wild-type **(A)**, S463D **(B)**, or S463A **(C)** CRN2 fused to GFP, together with mRFP-Lifeact, labeling F-actin-rich podosomes. Note co-localization of all three constructs with F-actin in the podosome core structure.

### Figure S5

siRNA-induced knock-down of CRN2 in primary human macrophages.

**A**, western blots of whole cell lysates of macrophages treated with CRN2-specific siRNA for 3 or 4 days, as indicated, compared to non-treated cells and cells transfected with control siRNA specific for firefly luciferase. Upper blot developed with anti-CRN2 antibody, lower blot developed with anti- $\beta$ -actin antibody.

**B**, fluorescence micrographs of macrophages transfected with control siRNA (upper row) or CRN2-specific siRNA (lower row) and stained for CRN2 (left column) and F-actin (middle column), with merged images shown in right column.

### Figure S6

Statistical evaluation of cells showing localization of CRN2 constructs at podosomes (wild-type, S463D, S463A) during over-expression (left bars; “non-treated cells”) or after podosome disruption by 30 min treatment with the Src family kinase inhibitor PP2 and subsequent podosome re-formation after 45 min of wash out (right bars, “re-formed podosomes”). The total number of cells expressing GFP-CRN2 proteins were counted and correlated with the number of cells showing a clear co-localization of GFP-CRN2 constructs

## Supplementary document.

with mRFP-Lifeact at podosomes. Note that CRN2 S463A targeting to re-assembled podosomes was impaired. For each value, 3x30 cells were counted. Values are given as mean percentage  $\pm$  SD of total counts.

### Figure S7

FRAP analysis of CRN2 dynamics in living macrophages.

GFP-fused CRN2 wild-type **(A)**, S463D **(B)**, or S463A **(C)** was transiently expressed in primary human macrophages. FRAP experiments were performed to determine protein half-life times in F-actin-rich podosome cores. Normalized fluorescence recovery curves were corrected for acquisition photobleaching and further processed by bi-exponential regression analyses, which allowed the calculation of half-life times. Each curve represents 15 measurements from podosomes of at least 3 different cells. Values are given as mean percentages  $\pm$  SD. Note especially elevated half-life time of the S463D variant (6.56 s) compared to wild-type (2.27 s).

**Supplementary tables****Table S1**

Parameters derived from small-angle X-ray scattering of synthetic pS463 CRN2 coiled coil peptide.

|                                     |       |       |       |
|-------------------------------------|-------|-------|-------|
| $\rho^*$ (mg ml <sup>-1</sup> )     | 18    | 9     | 4.5   |
| <b><i>Guinier fit</i></b>           |       |       |       |
| $R_g$ (Å)                           | 20    | 23    | 26    |
| M (g/mol)                           | 15270 | 16212 | 14555 |
| N                                   | 3.3   | 3.5   | 3.1   |
| <b><i>P(r)</i></b>                  |       |       |       |
| $R_{max}$ (Å)                       | 57    | 53    | 53    |
| $R_g$ (Å)                           | 20    | 20    | 20    |
| M (g/mol)                           | 15242 | 15405 | 13127 |
| N                                   | 3.3   | 3.3   | 2.8   |
| <b><i>Atomic model</i></b>          |       |       |       |
| $R_g$ (Å) <sup>a</sup>              | 15    |       |       |
| hydrodynamic $R_g$ (Å) <sup>b</sup> | 16    |       |       |

The parameters obtained at three different concentrations are consistent and therefore indicate the presence of a true trimer rather than aggregation effects. <sup>a</sup>determined with MOLEMAN2 <sup>3</sup>; <sup>b</sup>calculated with HYDROPRO <sup>4</sup>.

### Supplementary References

1. Appleton, B. A., Wu, P. & Wiesmann, C. The crystal structure of murine coronin-1: a regulator of actin cytoskeletal dynamics in lymphocytes. *Structure* **14**, 87-96 (2006).
2. Svergun, D., Barberato, C. & Koch, M. CRY SOL - a program to evaluate X-ray solution scattering of biological macromolecules from atomic coordinates. *Journal of Applied Crystallography* **28**, 768-773 (1995).
3. Kleywegt, G., Zou, J., Kjeldgaard, M. & Jones, T. in *International Tables for Crystallography* Vol. F. Crystallography of Biological Macromolecules (eds M. Rossmann & E. Arnold) 353-356, 366-367 (Kluwer Academic Publishers, 2001).
4. Garcia De La Torre, J., Huertas, M. L. & Carrasco, B. Calculation of hydrodynamic properties of globular proteins from their atomic-level structure. *Biophys J* **78**, 719-730 (2000).

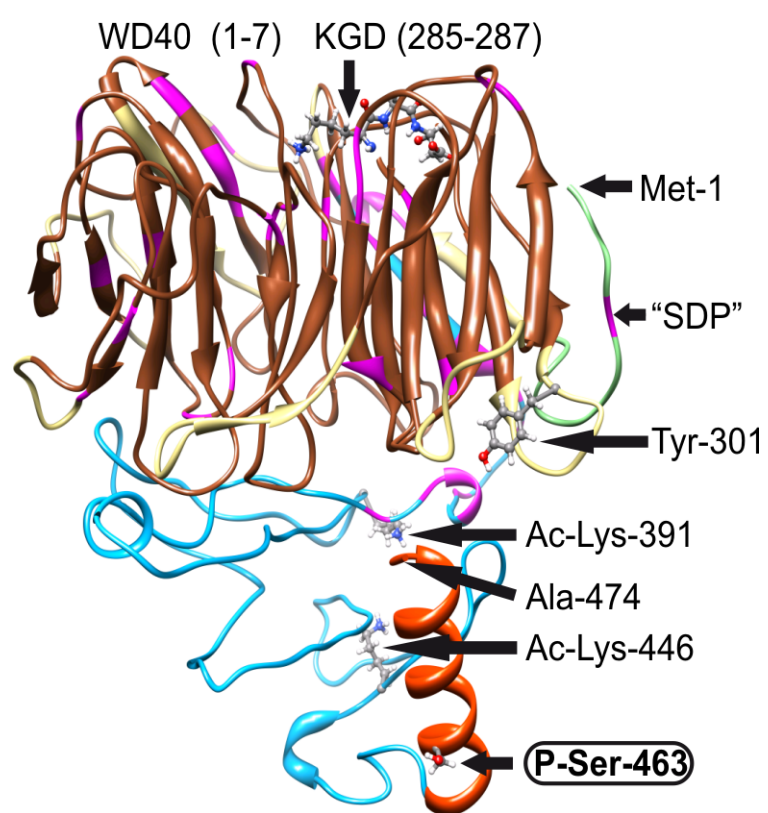

Figure S1

Supplementary document.

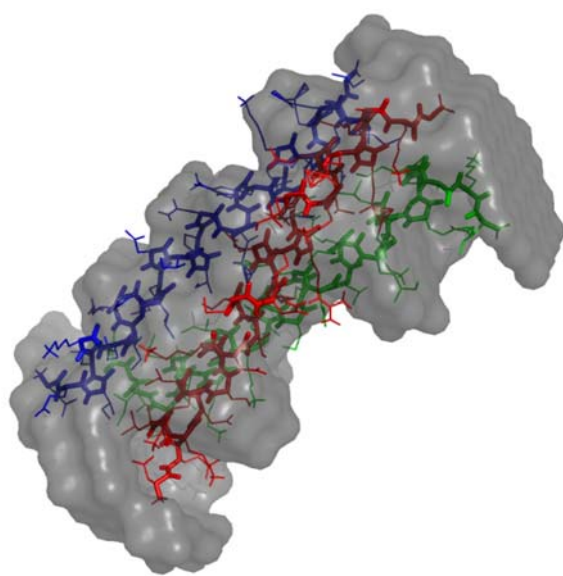

Figure S2

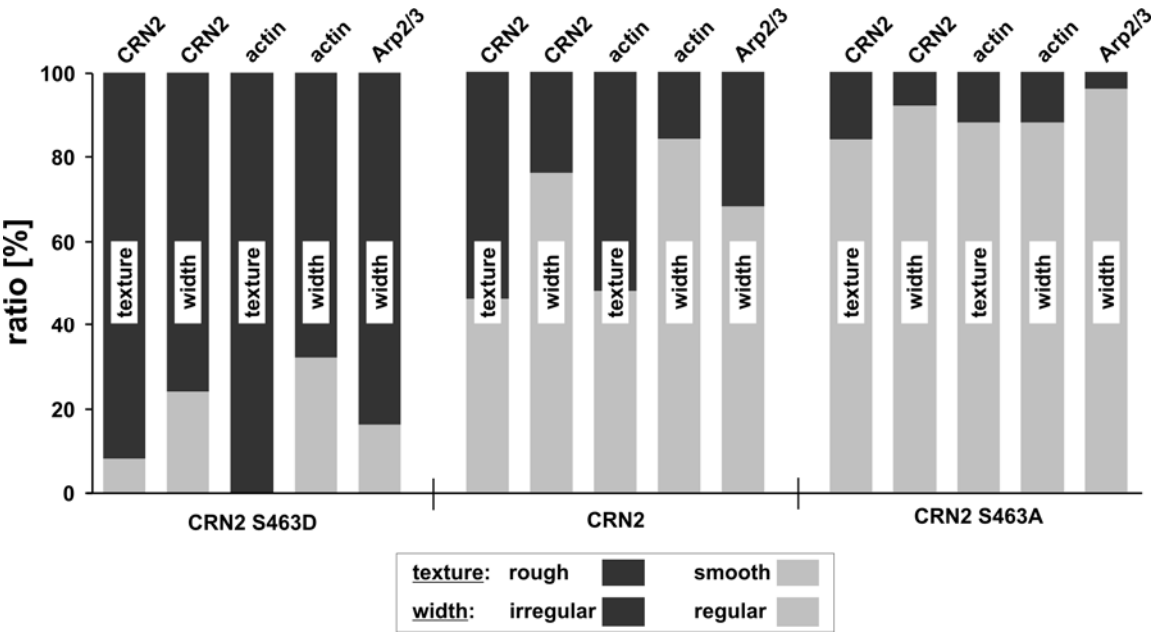

Figure S3

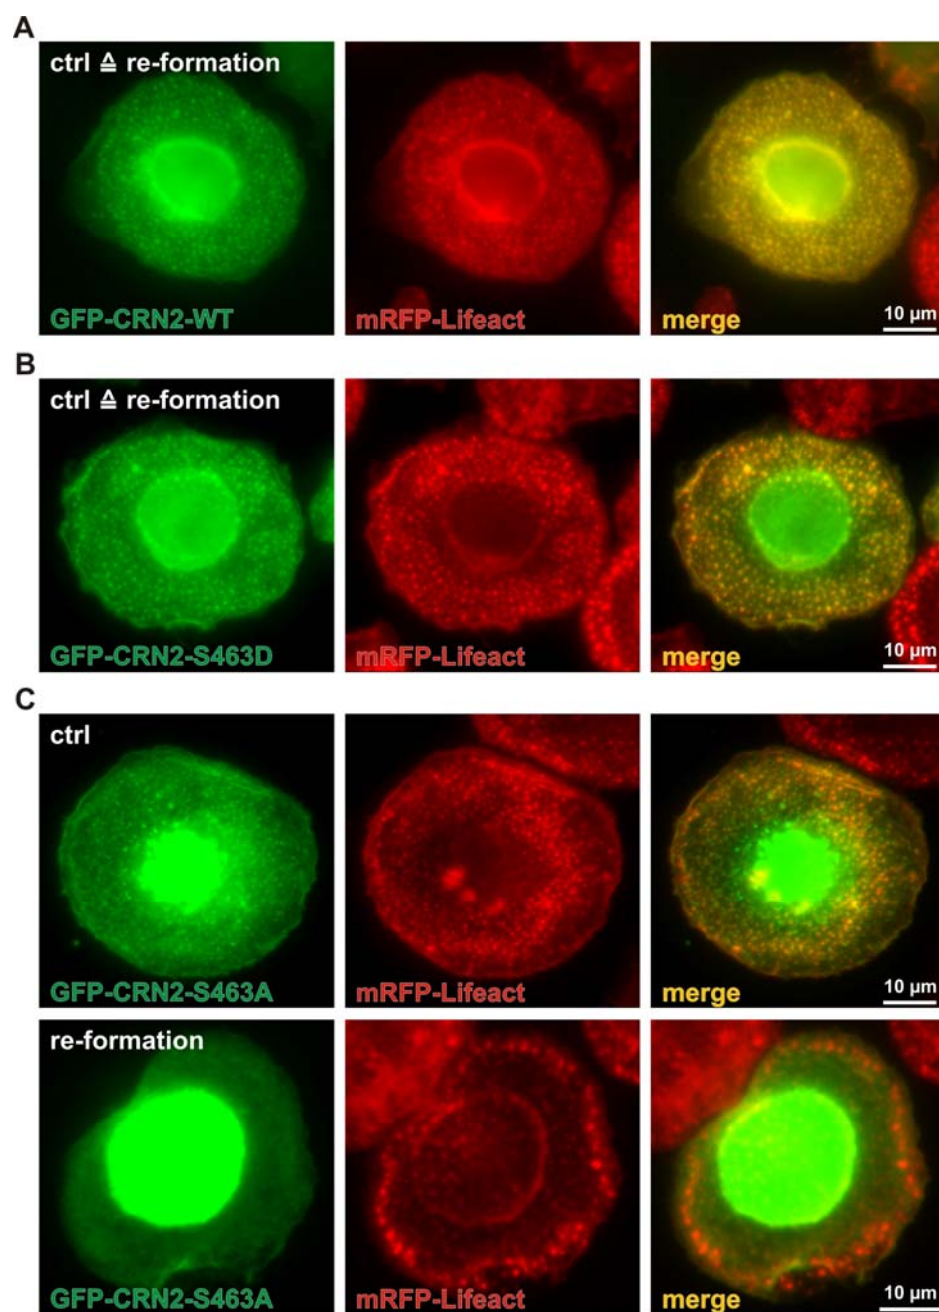

Figure S4

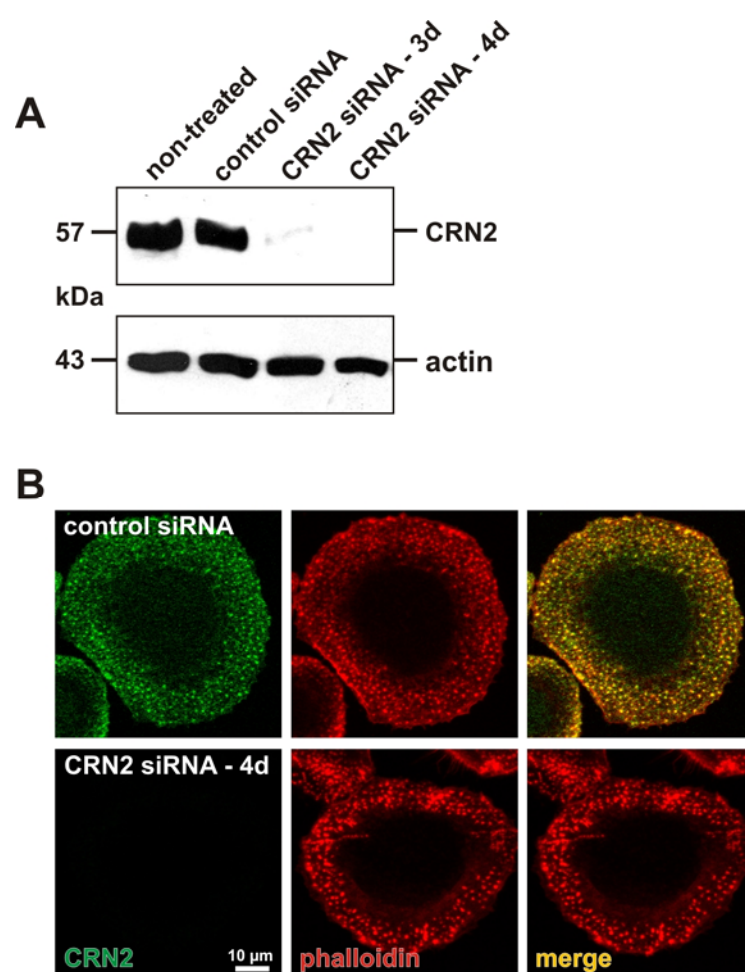

Figure S5

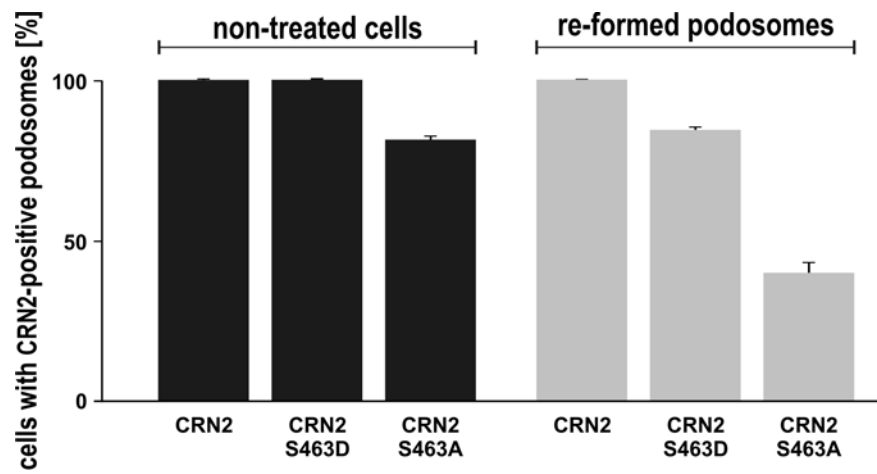

Figure S6

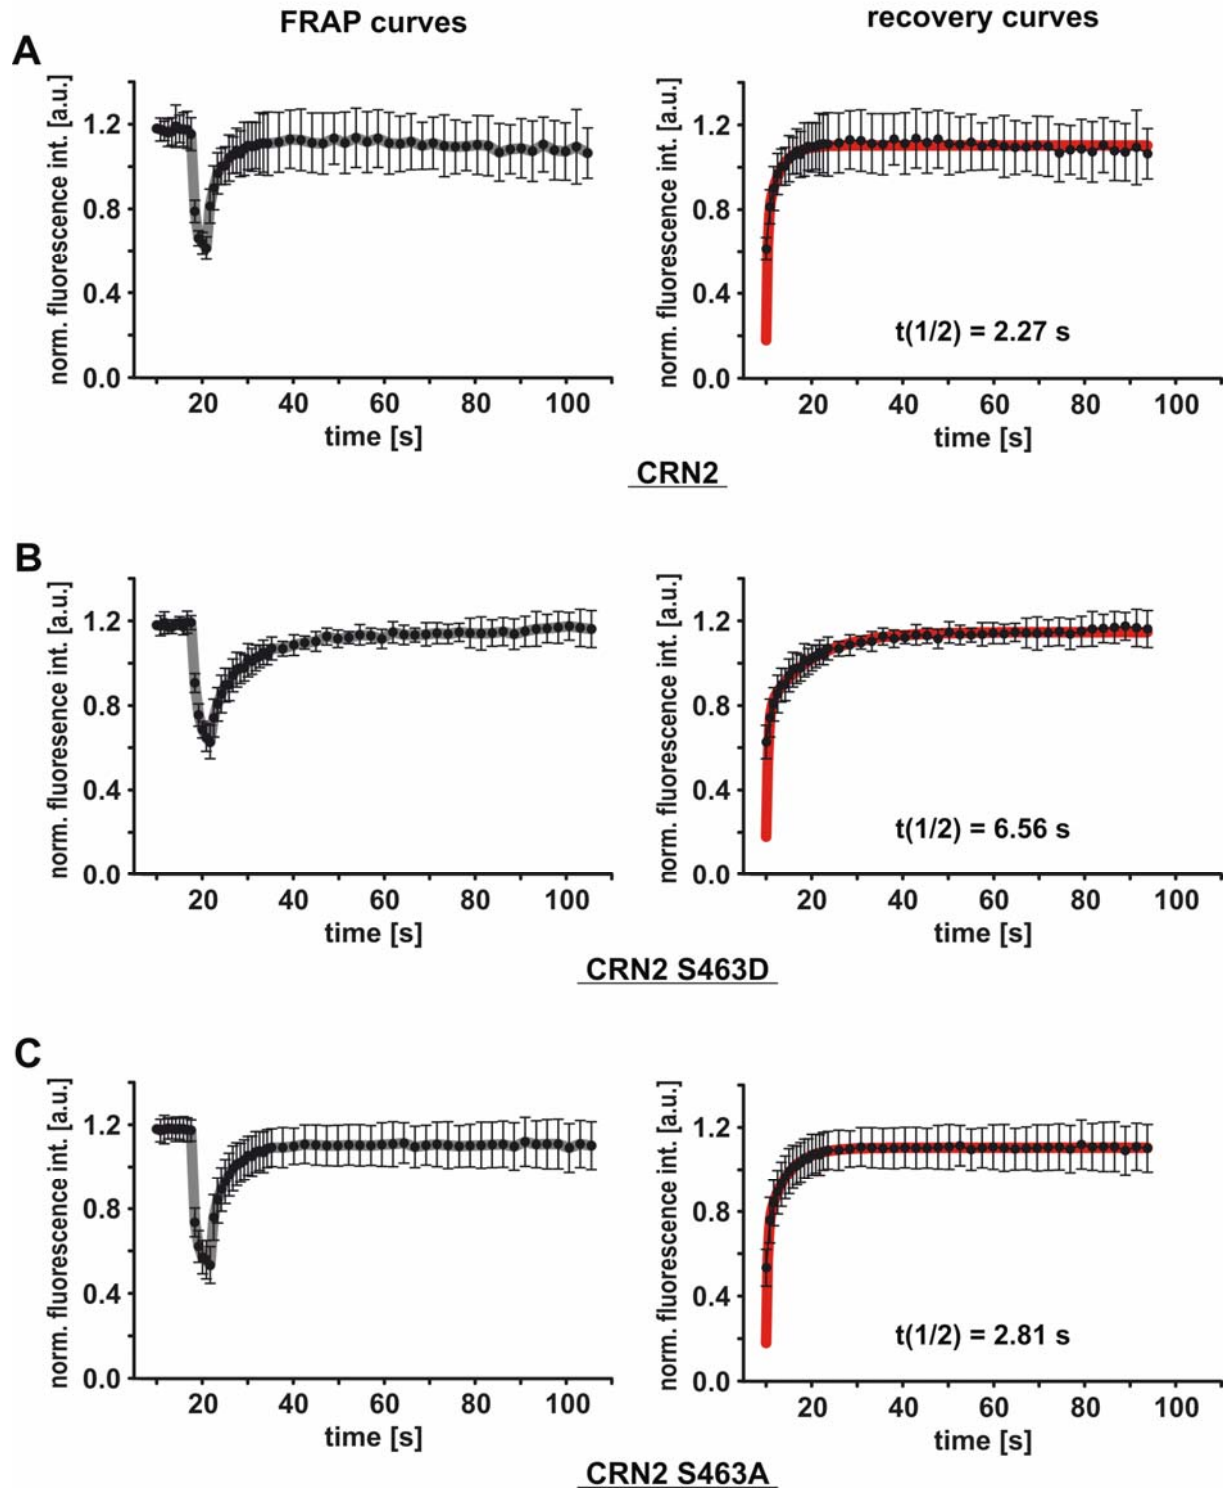

Figure S7
